# Supplementary material for: Mobility Restrictions and Air Quality under COVID-19 Pandemic in S&atilde;o Paulo, Brazil
Source: Preprints.org preprint supplement (doi:10.20944/preprints202004.0515.v1), 2020-04-30
Supplement: Supplementary file 1 [file supplementary]

## Supplementary Information

## Contents

Supplementary Table 1: CETESB stations and respective pollutants measured in each one.

Supplementary Note 1: Intelligent Monitoring System

Supplementary Fig. 1: Comparison between NO<sub>x</sub> ( $\mu\text{g m}^{-3}$ ) concentrations and Isolation rate (%), from March to April 2020, during the isolation period.

Supplementary Table 1: CETESB stations and respective pollutants measured in each one.

| Station \ Pollutant | Lat; Lon           | PM <sub>2.5</sub> | PM <sub>10</sub> | NO <sub>2</sub> | O <sub>3</sub> | CO |
|---------------------|--------------------|-------------------|------------------|-----------------|----------------|----|
| IPEN                | -23.5663; -46.7376 | x                 |                  |                 | x              |    |
| Congonhas           | -23.6163; -46.6634 | x                 | x                | x               |                | x  |
| C. César            | -23.5535, -46.6727 |                   | x                | x               |                | x  |
| Osasco              | -23.5268; -46.7921 | x                 | x                | x               |                | x  |
| N. S. do Ó          | -23.4796; -46.6916 |                   |                  |                 | x              |    |
| Santana             | -23.5060, -46.6290 | x                 |                  |                 | x              |    |
| Ibirapuera          | -23.5914; -46.6602 | x                 | x                | x               | x              | x  |
| Mooca               | -23.5493; -46.5981 | x                 |                  |                 | x              | x  |
| Pinheiros           | -23.5611; -46.7016 | x                 | x                | x               | x              | x  |
| P. D. Pedro II      | -23.5445; -46.6294 | x                 | x                | x               | x              | x  |
| Parelheiros         | -23,7763; -46,6969 | x                 |                  |                 | x              | x  |
| Interlagos          | -23.6805, -46.6750 |                   | x                | x               | x              |    |
| Itaquera            | -23.5800, -46.4666 |                   |                  |                 | x              |    |
| S. Amaro            | -23.6548; -46.7099 |                   |                  |                 | x              | x  |
| I. Paulista         | -23.5015; -46.4207 | x                 |                  |                 | x              |    |
| C. Redondo          | -23.6684; -46.7800 |                   |                  |                 | x              |    |
| Pte. Remédios       | -23,5187; -46,7433 | x                 | x                | x               |                | x  |
| P. Jaraguá          | -23,4563; -46,7661 | x                 | x                | x               | x              |    |
| Campinas            | -22,9025; -47,0572 |                   |                  | x               |                |    |
| Guarulhos           | -23,4555; -46,5185 |                   |                  | x               |                |    |
| S. B. Campo         | -23,6987; -46,5462 |                   |                  | x               |                |    |

## Supplementary Note 1: Intelligent Monitoring System

São Paulo State Government developed the Intelligent Monitoring System (“*Sistema de Monitoramento Inteligente*”, in Portuguese, SIMI-SP). By using mobile phone information, it can track the mobility trends and check the quarantine measures efficacy. Experts indicate that to control COVID-19 dissemination, the isolation rate must reach 70 %, however, no municipality in São Paulo state has reached that goal. Supplementary Fig. 1 shows how NO<sub>x</sub> concentrations are negatively correlated to “isolation rate”. Pinheiros air quality station represents the São Paulo city, Guarulhos and São Bernardo do Campo are located inside the MASP, and Campinas is located about 90 km to the northwest of São Paulo city. Different adherence to the “stay at home” was observed at cities in São Paulo state but at most the effect of reducing the mobility is clear (more details are available at <https://www.saopaulo.sp.gov.br/sala-de-imprensa/release/isolamento-social-em-sao-paulo-e-de-50-aponta-sistema-de-monitoramento-inteligente-4>).

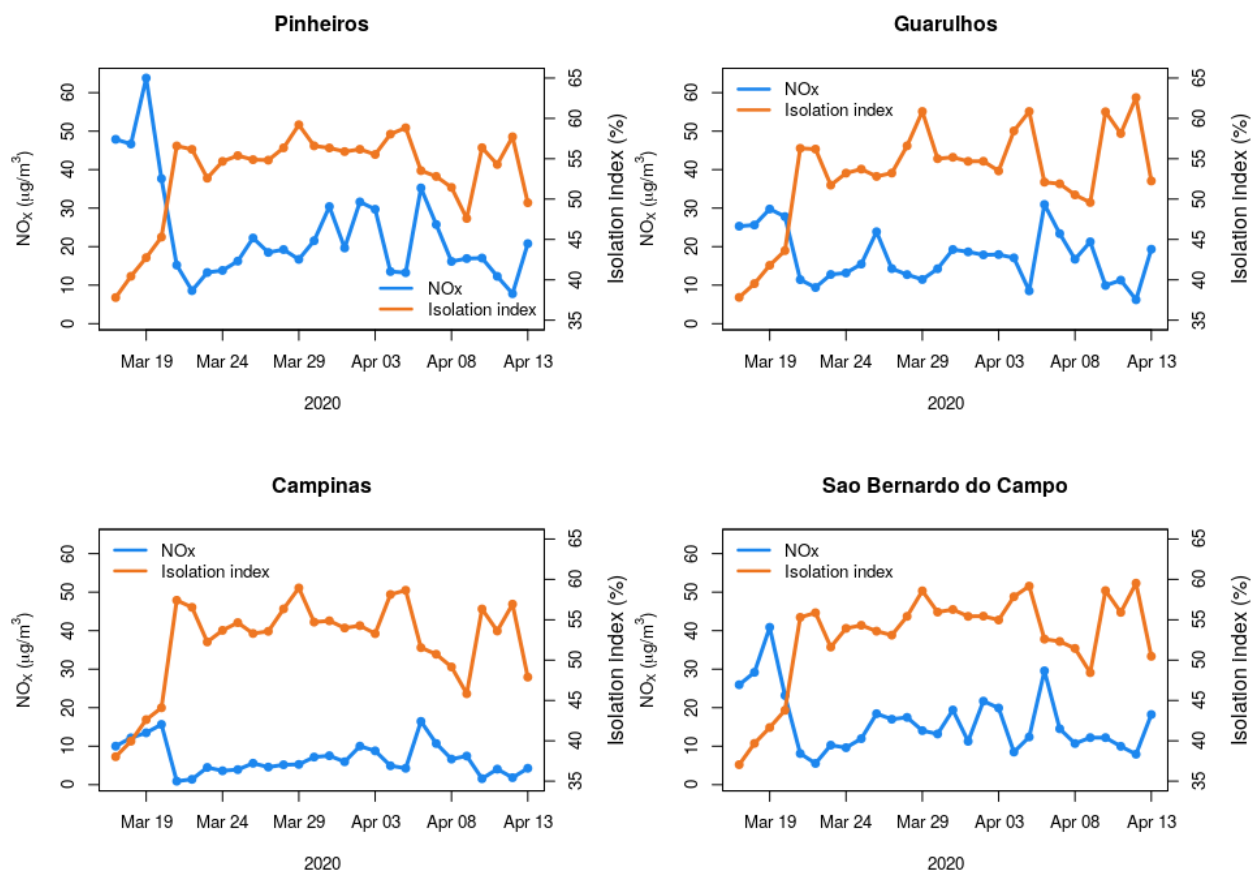

Supplementary Fig. 1: Comparison between NO<sub>x</sub> ( $\mu\text{g m}^{-3}$ ) concentrations and “Isolation index” (%), from March to April 2020, during the isolation period.
